# Supplementary material
Source: PubMed Central journal article supplement (PMC3429857)
Supplement: humu0031-0437-SD1.pdf [file humu0031-0437-SD1.pdf]

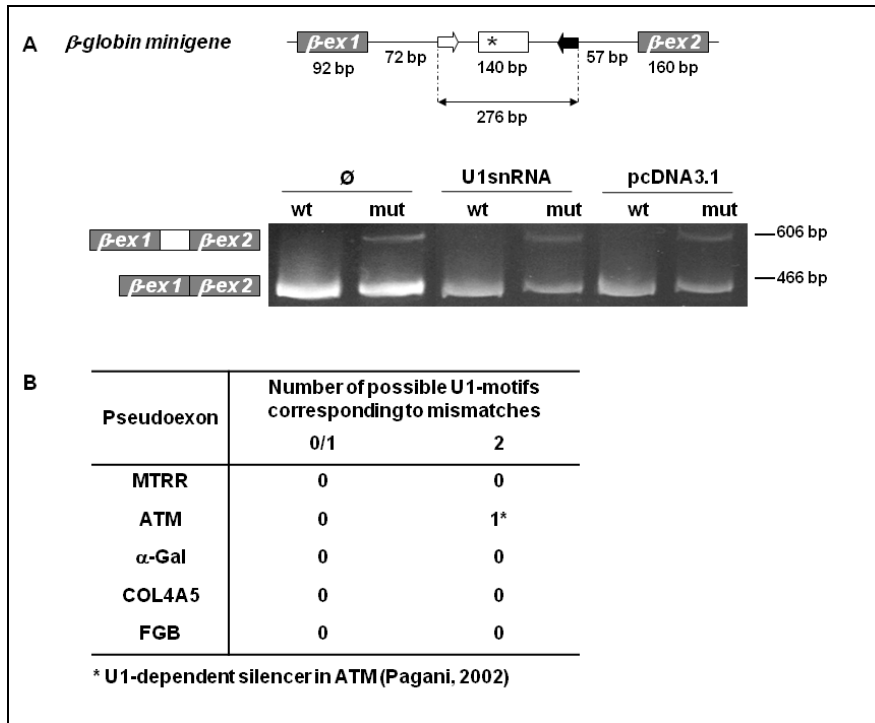

**Supp. Figure S1. A.** U1snRNA overexpression. HEK293 cells were co-transfected by the wild type or c.903+469T>C mutant  $\beta$ -globin minigenes and vector expressing U1 snRNA or empty expression vector *pcDNA3.1*. After RNA isolation the splicing products were analyzed by RT-PCR using minigene specific primers. The lower band represents correctly spliced minigene exons; the upper band represents the *MTRR* pseudoexon inserted between the minigene exons. **B.** U1snRNA binding motif analysis. The sequences of each pseudoexon were scanned for a presence of an U1snRNA binding site (caggttaagtat) with allowance of 0, 1 or 2 mismatches outside of the invariant +1G and +2T. The number of sites identified in the sequences of individual pseudoexons is listed in the table.

**Supp. Table S1. In silico analyses of MTRR authentic and pseudoexon splice sites**

| Program              | SpliceSiteFinder |      |       | NNSplice     |      | GeneSplicer |       | NetGene2 |      | SpliceView |       | MaxEnt |       |       |
|----------------------|------------------|------|-------|--------------|------|-------------|-------|----------|------|------------|-------|--------|-------|-------|
|                      | exon             | 5'SS | 3'SS  | branch point | 5'SS | 3'SS        | 5'SS  | 3'SS     | 5'SS | 3'SS       | 5'SS  | 3'SS   | 5'SS  | 3'SS  |
| <b>2<sup>s</sup></b> | 84.3             |      |       |              | n.f. |             | n.f.  |          | 0.89 |            | 83.0  |        | 6.12  |       |
| <b>3</b>             | 73.2             | 81.8 | 100.0 |              | 0.93 | 0.95        | n.f.  | 7.018    | 0.30 | 0.33       | 79.00 | 81.00  | 5.68  | 6.16  |
| <b>4</b>             | 87.6             | 82.9 | 81.0  |              | 0.99 | 0.92        | n.f.  | 5.548    | 0.93 | 0.77       | 86.00 | 82.00  | 9.16  | 8.49  |
| <b>5</b>             | 95.4             | 92.7 | 77.5  |              | 1.00 | 0.89        | n.f.  | 5.445    | 0.67 | 0.15       | 90.00 | 84.00  | 11.08 | 6.49  |
| <b>6</b>             | 79.4             | 87.4 | 88.9  |              | 0.98 | 0.73        | n.f.  | 3.262    | 0.83 | 0.36       | 78.00 | 83.00  | 9.14  | 7.54  |
| <b>pseudoexon</b>    | 84.1             | 96.9 | 76.0  |              | 0.90 | 0.98        | n.f.  | 12.582   | n.f. | 0.94       | 83.00 | 92.00  | 7.09  | 10.41 |
| <b>7</b>             | 80.1             | 81.1 | 75.1  |              | 0.89 | 0.90        | 7.318 | 5.882    | 0.63 | 0.07       | 85.00 | 86.00  | 8.92  | 7.82  |
| <b>8</b>             | 74.3             | 77.6 | 74.0  |              | 0.71 | n.f.        | n.f.  | 1.498    | 0.34 | 0.56       | 77.00 | 77.00  | 7.64  | 5.39  |
| <b>9</b>             | 88.5             | 86.4 | 71.6  |              | 0.99 | 0.62        | 9.370 | n.f.     | 0.47 | 0.16       | 87.00 | 82.00  | 11.11 | 6.17  |
| <b>10</b>            | 68.4             | 86.9 | 81.0  |              | 0.76 | 0.98        | n.f.  | n.f.     | 0.71 | 0.94       | 75.00 | 89.00  | 7.52  | 10.41 |
| <b>11</b>            | 94.4             | 87.5 | 98.0  |              | 1.00 | 0.90        | 4.914 | 5.540    | 0.83 | 0.15       | 89.00 | 85.00  | 10.57 | 10.37 |
| <b>12</b>            | 88.7             | 78.8 | 88.9  |              | 0.99 | n.f.        | n.f.  | 5.457    | 0.54 | n.f.       | 85.00 | n.f.   | 7.76  | 6.93  |
| <b>13</b>            | 69.7             | 86.7 | 89.2  |              | 0.74 | 0.99        | n.f.  | 7.196    | 0.55 | 0.82       | 74.00 | 89.00  | 8.35  | 9.09  |
| <b>14</b>            | 88.9             | 84.3 | 83.9  |              | 0.97 | 0.62        | n.f.  | n.f.     | 0.95 | 0.16       | 84.00 | 79.00  | 8.73  | 7.89  |
| <b>15</b>            |                  | 87.5 | 68.4  |              |      | 0.98        |       | 5.700    |      | 0.96       |       | 89.00  |       | 9.52  |
| <b>median</b>        | 84.2             | 86.6 | 81.0  |              | 0.97 | 0.91        | 7.32  | 5.55     | 0.67 | 0.36       | 83.50 | 84.00  | 8.54  | 7.89  |

SS = splice site; n.f. = not found

<sup>s</sup>The initiation codon of cytosolic isoform is harboured in exon 2, exon 1 is alternatively spliced and not translated.

Reference sequence of the cytosolic isoform of the *MTRR* gene, GenBank Accession No. NC\_000005.9 (g.DNA), was used for *in silico* analysis. All nucleotide numbering regarding the *MTRR* gene (NM\_002454.2) reflects cDNA numbering with +1 corresponding to the A of the ATG translation initiation codon in the reference sequence, according to journal guidelines (www.hgvs.org/mutnomen). The initiation codon is codon 1.
